# Supplementary material for: Distinct beta frequencies reflect categorical decisions
Source: PubMed Central journal article supplement (PMC10203257; doi:10.1038/s41467-023-38675-3), 2023-05-22
Supplement: 41467_2023_38675_MOESM1_ESM.pdf [file 41467_2023_38675_MOESM1_ESM.pdf]

| <b>Monkey 1 dIPFC</b>     | mean (+/- SD)<br>prestimulus | mean (+/- SD)<br>decision | decision ><br>prestimulus (t) | decision ><br>prestimulus (p) |
|---------------------------|------------------------------|---------------------------|-------------------------------|-------------------------------|
| frequency (Hz)            | 24.8 (+/- 1.8)               | 28.6 (+/- 2.3)            | 23.3                          | <1e-12                        |
| burst frequency (Hz)      | 22.3 (+/- 1.5)               | 25.1 (+/- 2.3)            | 14.4                          | <1e-12                        |
| burst number              | 1.44 (+/- 0.23)              | 1.76 (+/- 0.33)           | 18.9                          | <1e-12                        |
| burst peak power (a.u.)   | 3.71 (+/- 0.21)              | 4.04 (+/- 0.31)           | 15.9                          | <1e-12                        |
| burst time span (s)       | 158 (+/- 19)                 | 194 (+/- 38)              | 12.1                          | <1e-12                        |
| burst frequency span (Hz) | 6.35 (+/- 0.63)              | 7.12 (+/- 0.96)           | 10.1                          | <1e-12                        |

**Table S1.** Beta frequency shift and burst profile during prestimulus vs decision delay in Monkey 1 dIPFC. t-values are results of two-sided t-tests, no adjustments for multiple comparisons, all t-value df = 198.

| <b>Monkey 1 preSMA</b>    | mean (+/- SD)<br>prestimulus | mean (+/- SD)<br>decision | decision ><br>prestimulus (t) | decision ><br>prestimulus (p) |
|---------------------------|------------------------------|---------------------------|-------------------------------|-------------------------------|
| frequency (Hz)            | 24.1 (+/- 1.5)               | 26.8 (+/- 3.2)            | 12.7                          | <1e-12                        |
| burst frequency (Hz)      | 22.1 (+/- 1.3)               | 23.7 (+/- 2.1)            | 14.5                          | <1e-12                        |
| burst number              | 1.62 (+/- 0.21)              | 2.04 (+/- 0.31)           | 30.3                          | <1e-12                        |
| burst peak power (a.u.)   | 3.71 (+/- 0.24)              | 4.13 (+/- 0.50)           | 13.1                          | <1e-12                        |
| burst time span (s)       | 170 (+/- 17)                 | 193 (+/- 27)              | 10.8                          | <1e-12                        |
| burst frequency span (Hz) | 6.81 (+/- 0.58)              | 7.31 (+/- 0.81)           | 9.0                           | <1e-12                        |

**Table S2.** Beta frequency shift and burst profile of prestimulus vs. decision delay beta activity in Monkey 1 preSMA. t-values are results of two-sided t-tests, no adjustments for multiple comparisons, all t-value df = 198.

| <b>Monkey 2 preSMA</b>    | mean (+/- SD)<br>prestimulus | mean (+/- SD)<br>decision | decision ><br>prestimulus (t) | decision ><br>prestimulus (p) |
|---------------------------|------------------------------|---------------------------|-------------------------------|-------------------------------|
| frequency (Hz)            | 21.0 (+/- 0.8)               | 24.0 (+/- 1.9)            | 6.8                           | 3e-6                          |
| burst frequency (Hz)      | 21.4 (+/- 1.0)               | 26.2 (+/- 2.2)            | 12.8                          | 4e-10                         |
| burst number              | 1.37 (+/- 0.22)              | 1.06 (+/- 0.29)           | -6.1                          | 1e-5                          |
| burst peak power (a.u.)   | 3.81 (+/- 0.20)              | 4.43 (+/- 0.53)           | 4.7                           | 2e-4                          |
| burst time span (ms)      | 194 (+/- 19)                 | 127 (+/- 18)              | -15.6                         | 1e-11                         |
| burst frequency span (Hz) | 6.63 (+/- 0.47)              | 4.51 (+/- 1.05)           | -7.3                          | 1e-6                          |

**Table S3.** Beta frequency shift and burst profile of prestimulus vs. decision delay beta activity in Monkey 2 preSMA. t-values are results of two-sided t-tests, no adjustments for multiple comparisons, all t-value df = 17.

| <b>dIPFC</b>  | short trials (Hz)<br>mean (+/-SD) | long trials (Hz)<br>mean (+/-SD) | short > long<br>(T(df)) | short > long (p) |
|---------------|-----------------------------------|----------------------------------|-------------------------|------------------|
| Monkey 1 - T1 | 30.0 (+/- 2.0)                    | 29.2 (+/- 1.4)                   | 2.6 (59)                | .012             |
| Monkey 1 - T2 | 29.9 (+/- 1.8)                    | 28.0 (+/- 1.3)                   | 9.0 (56)                | 2e-12            |
| Monkey 1 - T3 | 29.9 (+/- 1.7)                    | 28.0 (+/- 1.2)                   | 8.9 (44)                | 2e-11            |
| Monkey 1 - S2 | 29.3 (+/- 1.4)                    | 28.2 (+/- 1.3)                   | 5.2 (36)                | 8e-6             |

**Table S4.** Beta frequency shift in dIPFC during decision delay for trials categorized as “short” vs. “long”. T1, T2, and T3 are the interval categorization tasks with the shortest, middle, and longest sets of intervals (see Figure 1b for exact values), respectively. S2 is the distance categorization task with the middle set of distances (see Figure 1b for exact values). t-values are results of two-sided t-tests, no adjustments for multiple comparisons.

| <b>preSMA</b>        | short trials (Hz)<br>mean (+/-SD) | long trials (Hz)<br>mean (+/-SD) | short > long<br>(t(df)) | short > long (p) |
|----------------------|-----------------------------------|----------------------------------|-------------------------|------------------|
| Monkey 1 - T1        | 30.1 (+/- 2.2)                    | 28.1 (+/- 2.0)                   | 5.4 (59)                | 1e-6             |
| Monkey 1 - T2        | 29.3 (+/- 2.4)                    | 27.7 (+/- 1.8)                   | 4.2 (56)                | 1e-4             |
| Monkey 1 - T3        | 29.0 (+/- 2.5)                    | 27.4 (+/- 1.6)                   | 3.3 (43)                | .002             |
| Monkey 1 - S2        | 28.7 (+/- 2.0)                    | 27.3 (+/- 1.7)                   | 4.7 (35)                | 4e-5             |
| Monkey 2 - all tasks | 25.2 (+/- 2.7)                    | 23.6 (+/- 2.8)                   | 2.7 (14)                | .016             |

**Table S5.** Beta frequency shift in preSMA during decision delay for trials categorized as “short” vs. “long”. T1, T2, and T3 are the interval categorization tasks with the shortest, middle, and longest sets of intervals, respectively (see Figure 1b for exact values). S2 is the distance categorization task with the middle set of distances. For Monkey 2, tasks additionally included S1 and S3, the distance categorization tasks with the shortest and longest distances, respectively. t-values are results of two-sided t-tests, no adjustments for multiple comparisons.

| <b>Monkey 1 dIPFC</b>     | mean (+/- SD)<br>short trials | mean (+/- SD)<br>long trials | short > long (t) | short > long (p) |
|---------------------------|-------------------------------|------------------------------|------------------|------------------|
| burst frequency (Hz)      | 28.7 (+/- 1.1)                | 27.6 (+/- 1.0)               | 10.8             | <1e-12           |
| burst number              | 1.73 (+/-0.38)                | 1.8 (+/- 0.34)               | -2.1             | .039             |
| burst peak power (a.u.)   | 3.95 (+/- 0.30)               | 4.07 (+/- 0.39)              | -3.4             | 6e-4             |
| burst time span (ms)      | 194 (+/- 51)                  | 203 (+/- 45)                 | -1.8             | .070             |
| burst frequency span (Hz) | 6.84 (+/- 1.26)               | 7.50 (+/- 1.10)              | -5.5             | 8e-8             |

**Table S6.** Beta burst profile in dIPFC during decision delay for trials categorized as “short” vs. “long”. t-values are results of two-sided t-tests, no adjustments for multiple comparisons, all t-value df = 198.

| <b>Monkey 1 preSMA</b>    | mean (+/- SD)<br>short trials | mean (+/- SD)<br>long trials | short > long (t) | short > long (p) |
|---------------------------|-------------------------------|------------------------------|------------------|------------------|
| burst frequency (Hz)      | 28.4 (+/- 1.0)                | 27.4 (+/- 0.9)               | 9.9              | <1e-12           |
| burst number              | 2.02 (+/- 0.33)               | 2.05 (+/- 0.32)              | -0.8             | .400             |
| burst peak power (a.u.)   | 4.04 (+/- 0.43)               | 4.19 (+/- 0.43)              | -3.5             | 5e-4             |
| burst time span (ms)      | 193 (+/- 37)                  | 202 (+/- 33)                 | -2.4             | 0.018            |
| burst frequency span (Hz) | 7.24 (+/- 1.07)               | 7.69 (+/- 0.85)              | -4.6             | 5e-6             |

**Table S7.** Beta burst profile in Monkey 1 preSMA during decision delay for trials categorized as “short” vs. “long”. t-values are results of two-sided t-tests, no adjustments for multiple comparisons, all t-value df = 198.

| <b>Monkey 2 preSMA</b>    | mean (+/- SD)<br>short trials | mean (+/- SD)<br>long trials | short > long (t) | short > long (p) |
|---------------------------|-------------------------------|------------------------------|------------------|------------------|
| burst frequency (Hz)      | 25.9 (+/- 1.5)                | 25.2 (+/- 1.4)               | 3.1              | .006             |
| burst number              | 1.00 (+/- 0.29)               | 0.97 (+/- 0.41)              | -0.5             | .594             |
| burst peak power (a.u.)   | 4.68 (+/- 0.71)               | 4.59 (+/- 0.74)              | 0.8              | .436             |
| burst time span (ms)      | 114 (+/- 15)                  | 128 (+/- 31)                 | -2.0             | .061             |
| burst frequency span (Hz) | 3.93 (+/- 1.23)               | 4.37 (+/- 1.22)              | -2.6             | .018             |

**Table S8.** Beta burst profile in Monkey 2 preSMA during decision delay for trials categorized as “short” vs. “long”. t-values are results of two-sided t-tests, no adjustments for multiple comparisons, all t-value df = 17.

| <b>Monkey 1 dIPFC</b> | long trials (Hz)<br>mean (+/- SD) | short trials (Hz)<br>mean (+/- SD) | short > long<br>(t (df)) | short > long (p) |
|-----------------------|-----------------------------------|------------------------------------|--------------------------|------------------|
| 450ms                 | 29.1 (+/- 1.9)                    | 30.2 (+/- 2.1)                     | 2.6 (99)                 | .011             |
| 500ms                 | 29.1 (+/- 1.6)                    | 30.1 (+/- 2.0)                     | 2.9 (99)                 | .005             |
| 870ms                 | 28.5 (+/- 1.6)                    | 30.1 (+/- 1.7)                     | 4.4 (81)                 | 4e-5             |
| 920ms                 | 28.9 (+/- 2.0)                    | 30.5 (+/- 1.5)                     | 6.42 (82)                | 8e-9             |

**Table S9.** Beta frequency shift in dIPFC during decision delay of the duration categorization tasks, for trials with identical stimuli within different task versions (i.e., trials with identical stimuli categorized as “short” in one task version but “long” in another; see overlapping stimuli outlined in Figure 1b). t-values are results of two-sided t-tests, no adjustments for multiple comparisons.

| <b>Monkey 1 preSMA</b> | long trials (Hz)<br>mean (+/- SD) | short trials (Hz)<br>mean (+/- SD) | short > long<br>(t (df)) | short > long (p) |
|------------------------|-----------------------------------|------------------------------------|--------------------------|------------------|
| 450ms                  | 29.2 (+/- 2.5)                    | 30.1 (+/- 2.1)                     | 1.99 (99)                | .049             |
| 500ms                  | 28.9 (+/- 2.0)                    | 30.0 (+/- 2.3)                     | 2.8 (99)                 | .006             |
| 870ms                  | 28.2 (+/- 1.6)                    | 29.3 (+/-2.3)                      | 2.8 (81)                 | .007             |
| 920ms                  | 28.4 (+/- 1.7)                    | 29.6 (+/- 2.0)                     | 2.9 (82)                 | .005             |

**Table S10.** Beta frequency shift in preSMA during decision delay of the duration categorization tasks, for trials with identical stimuli within different task versions (i.e., trials with identical stimuli categorized as “short” in one task version but “long” in another; see overlapping stimuli outlined in Figure 1b). t-values are results of two-sided t-tests, no adjustments for multiple comparisons.

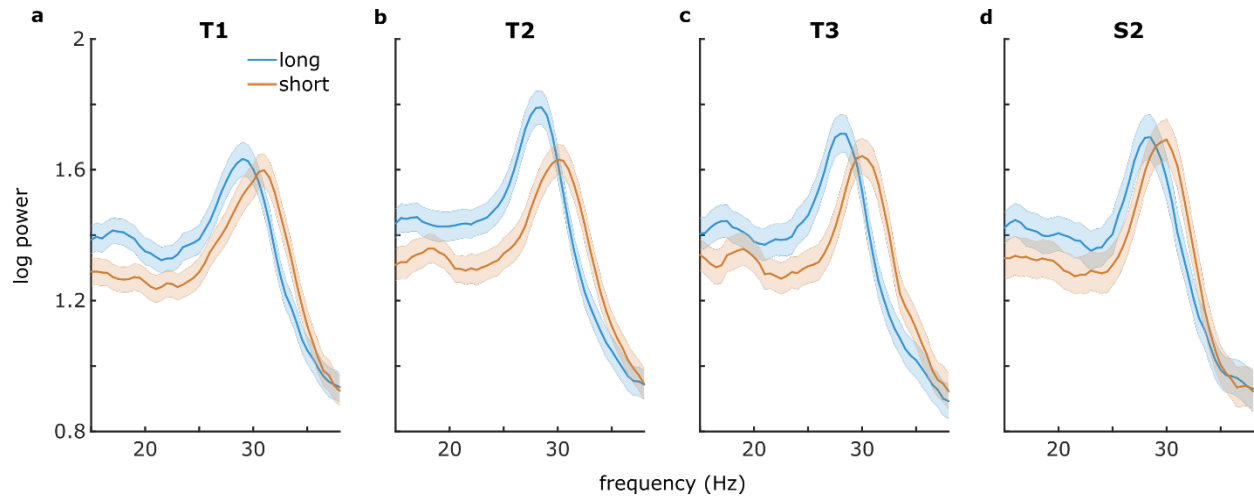

**Figure S1.** Beta peak frequency in monkey 1 dIPFC reflected the categorical decision during the decision delay in each version of the task. Power spectra for “long” stimulus (blue) vs. “short” stimulus trials (orange) during trials with correct responses (**a-c**) in the temporal categorization versions of the task with the shortest to longest stimuli respectively, and (**d**) the distance categorization task (see Figure 1b for exact values and Table S4 for statistics). Shaded regions around the line graphs represent the standard error of the mean.

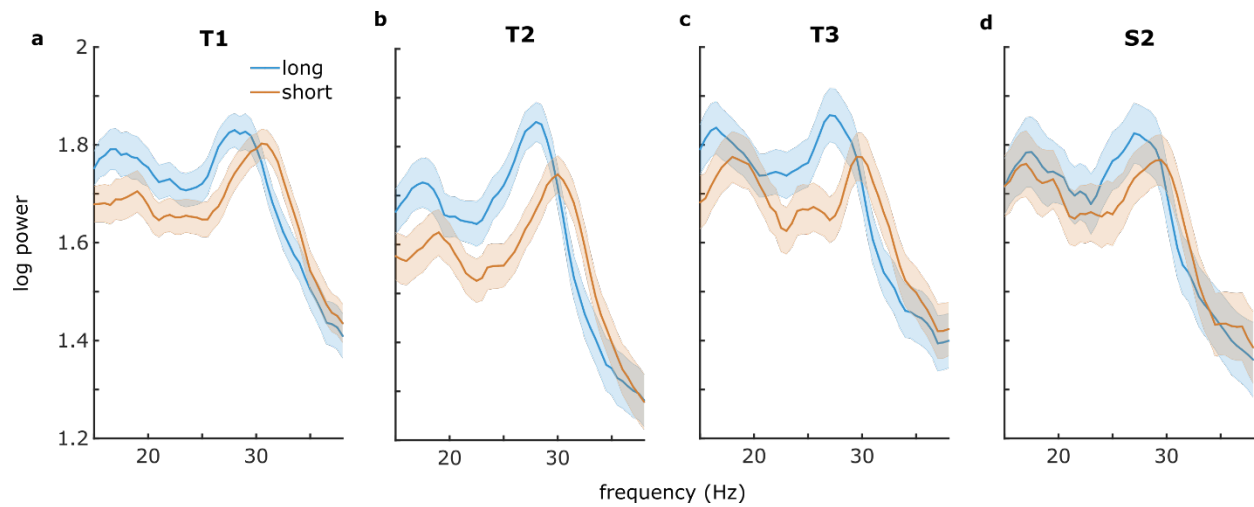

**Figure S2.** Beta peak frequency in monkey 1 preSMA reflected the categorical decision during the decision delay in each version of the task. Power spectra for “long” stimulus (blue) vs. “short” stimulus trials (orange) during trials with correct responses (**a-c**) in the temporal categorization versions of the task with the shortest to longest stimuli respectively, and (**d**) the distance categorization task (see Figure 1b for exact values and Table S5 for statistics). Shaded regions around the line graphs represent the standard error of the mean.

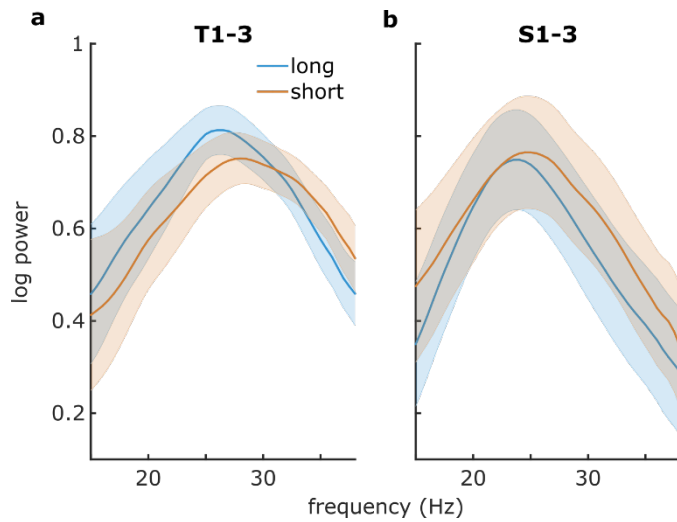

**Figure S3.** Beta peak frequency in monkey 2 preSMA reflected the categorical decision during the decision delay in each version of the task. Power spectra for “long” stimulus (blue) vs. “short” stimulus trials (orange) during trials with correct responses **(a)** in the temporal categorization versions of the task (pooled together) and **(b)** the distance categorization versions of the task (pooled together; see Figure 1b for exact stimulus values and Table S5 for statistics). Shaded regions around the line graphs represent the standard error of the mean.

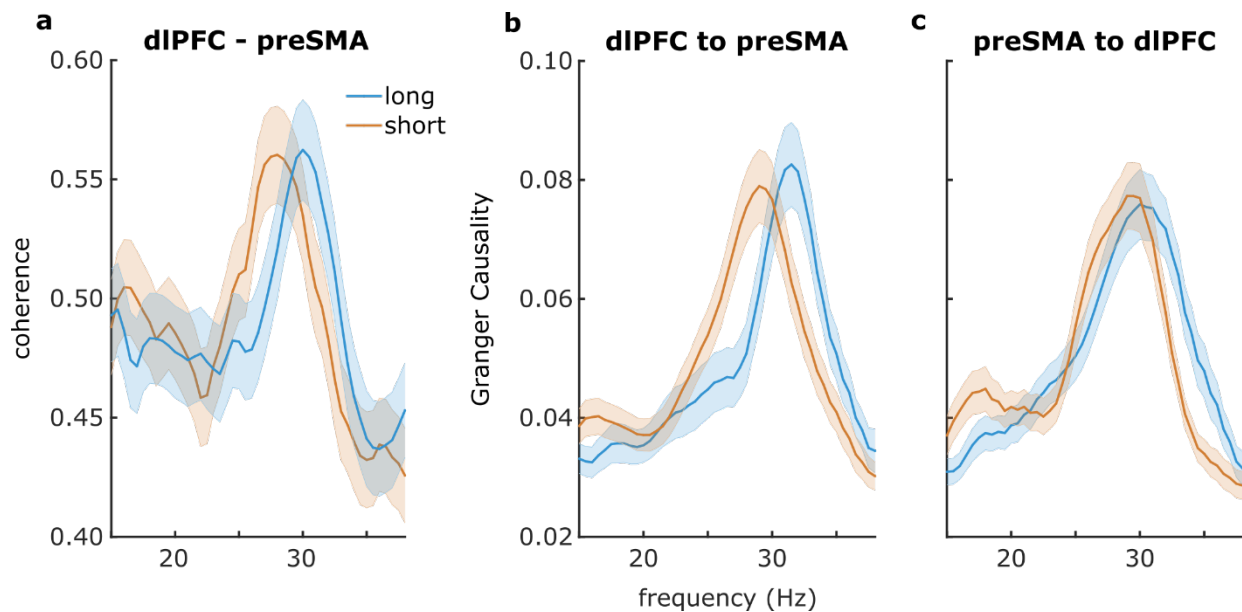

**Figure S4.** Peak frequencies of between-region connectivity reflected the categorical decision during the decision delay, even when the decision was incorrect. **(a)** Coherence between preSMA and dIPFC on incorrect trials. The direction of the peak frequency shift was

reversed compared with correct trials (see Figure 4a). **(b, c)** Granger causality between preSMA and dIPFC. The direction of the peak frequency of dIPFC to preSMA and that of preSMA to dIPFC Granger causality were reversed compared with correct trials (see Figure 4 c, d). However, on both correct and incorrect trials, peak frequency of dIPFC to preSMA, but not preSMA to dIPFC Granger causality, reflected the categorical decision. Shaded regions around the line graphs represent the standard error of the mean.

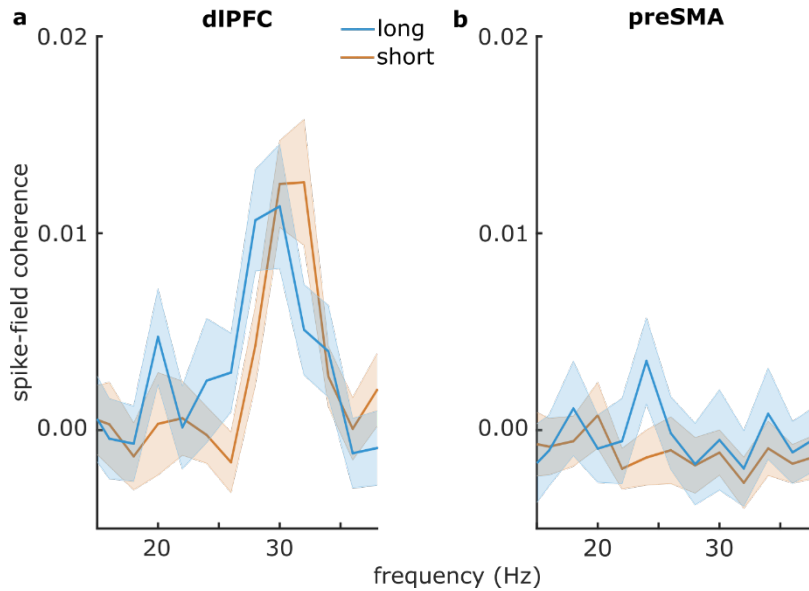

**Figure S5.** Peak frequency of spike-field coherence during the decision delay reflected the categorical decision in dIPFC but not preSMA. **(a)** Spike-field coherence in dIPFC between short-selective neurons and the LFP during short-categorized trials, and between long-selective neurons and the LFP during long-categorized trials: the peak frequency reflected the categorical decision. **(b)** Same for preSMA: there were no significant peaks in the beta range. Shaded regions around the line graphs represent the standard error of the mean.
